# Supplementary material
Source: HighWire-hosted journal article supplement (https://bmjopen.bmj.com/content/9/5/e025915)

**Supplementary Table 1. The definitions of the four cardio-metabolic risk factors of the study.**

| Cardio-metabolic risk factors | Definition                                                    |
|-------------------------------|---------------------------------------------------------------|
| Obesity                       | BMI $\geq$ 28kg/m <sup>2</sup>                                |
| Hypertension                  | Blood pressure $\geq$ 140/90mmHg and/or self-reported disease |
| Dyslipidemia                  | LDL-C $\geq$ 4.14 mmol/L and/or self-reported disease         |
| Diabetes                      | Fasting PG $\geq$ 7.0 mmol/L and/or self-reported disease     |

**Supplementary Table 2. Clinical and laboratory characteristics of participants.**

| Variable                 | Survey Year  |              | <i>P</i> |
|--------------------------|--------------|--------------|----------|
|                          | 2008 (n, %)  | 2017 (n, %)  |          |
| <b>All</b>               | 8017         | 9379         |          |
| <b>Sex</b>               |              |              |          |
| Man                      | 5171(64.5)   | 5947(63.41)  | 0.14     |
| Women                    | 2846(35.5)   | 3432(36.59)  |          |
| <b>Age</b>               | 51.08±15.14  | 53.69±16.77  | <0.001   |
| <30                      | 684(8.53)    | 836(8.91)    | <0.001   |
| 30-40                    | 1213(15.13)  | 1477(15.75)  |          |
| 40-50                    | 2016(25.15)  | 1354(14.44)  |          |
| 50-60                    | 1781(22.22)  | 2067(22.04)  |          |
| 60-70                    | 1142(14.24)  | 1832(19.53)  |          |
| 70+                      | 1181(14.73)  | 1813(19.33)  |          |
| <b>BMI</b>               |              |              |          |
| Thin (<18.5)             | 280(3.49)    | 229(2.44)    | <0.001   |
| Normal (18.5-24)         | 3948(49.25)  | 4184(44.61)  |          |
| Overweight (24-28)       | 3064(38.22)  | 3812(40.64)  |          |
| Obese (≥28)              | 725(9.04)    | 1154(12.3)   |          |
| <b>Examination Index</b> |              |              |          |
| Systolic pressure        | 125.63±18.17 | 130.01±18.99 | <0.001   |
| Diastolic pressure       | 80.85±10.69  | 77.11±10.79  | <0.001   |

|                       |           |           |        |
|-----------------------|-----------|-----------|--------|
| LDL-C                 | 2.95±0.73 | 3.15±0.86 | <0.001 |
| Fasting blood glucose | 5.52±1.12 | 5.99±1.32 | <0.001 |

---

**Supplementary Table 3. The prevalence rates of hypertension, hypercholesterolemia and diabetes in 2008 and 2017 year based on the examination test and self-reported separately.**

| Disease             | Survey year | Examination test |                    |                    | Self-reported |                    |                    |
|---------------------|-------------|------------------|--------------------|--------------------|---------------|--------------------|--------------------|
|                     |             | No. of cases     | Prevalence         | Stand-prevalence   | No. of cases  | Prevalence         | Stand-prevalence   |
|                     |             | (n)              | (%)                | (%) <sup>a</sup>   | (n)           | (%)                | (%) <sup>a</sup>   |
| <b>Hypertension</b> | 2008        | 2420             | 30.19(29.19-31.19) | 22.31(21.40-23.22) | 1632          | 20.36(19.48-21.24) | 13.11(12.37-13.85) |
|                     | 2017        | 3042             | 32.43(31.48-33.38) | 21.4(20.57-22.23)  | 1728          | 18.42(17.64-19.20) | 9.48(8.89-10.07)   |
| <b>Dyslipidemia</b> | 2008        | 451              | 5.63(5.13-6.13)    | 4.67(4.21-5.13)    | 488           | 6.09(5.57-6.61)    | 4.27(3.83-4.71)    |
|                     | 2017        | 1140             | 12.15(11.49-12.81) | 10.88(10.25-11.51) | 220           | 2.35(2.04-2.66)    | 1.27(1.04-1.50)    |
| <b>Diabetes</b>     | 2008        | 486              | 6.06(5.53-6.58)    | 3.82(5.54-6.58)    | 447           | 5.58(5.08-6.08)    | 3.39(2.99-3.79)    |
|                     | 2017        | 1004             | 10.70(10.07-11.33) | 6.02(5.54-6.50)    | 494           | 5.27(4.82-5.72)    | 2.43(2.12-2.74)    |

<sup>a</sup> Stand-prevalence: standardized prevalence; the prevalence rates were standardized by age and sex based on the 2010 Chinese census population.

**Supplementary Table 4. The prevalence rates of hypertension, dyslipidemia and diabetes in 2008 and 2017 year stratified by age and gender based on the examination test and self-reported separately.**

| Disease             | Examination test |              |                |              |                |              |                |              |                |
|---------------------|------------------|--------------|----------------|--------------|----------------|--------------|----------------|--------------|----------------|
|                     | 2008             |              |                |              | 2017           |              |                |              |                |
|                     | Man              |              | Female         |              | Man            |              | Female         |              |                |
|                     | Age Group        | No. of cases | Prevalence (%) |
| <b>Hypertension</b> | <29              | 68           | 18.99          | 8            | 2.45           | 68           | 14.44          | 4            | 1.1            |
|                     | 30-39            | 170          | 21.88          | 14           | 3.21           | 161          | 19.73          | 22           | 3.33           |
|                     | 40-49            | 392          | 29.45          | 70           | 10.22          | 219          | 27.55          | 56           | 10.02          |
|                     | 50-59            | 453          | 40.16          | 139          | 21.29          | 499          | 35.72          | 136          | 20.3           |
|                     | 60-69            | 353          | 46.69          | 125          | 32.38          | 562          | 46.33          | 233          | 37.64          |
|                     | 70+              | 440          | 53.59          | 188          | 52.22          | 760          | 60.56          | 322          | 57.71          |
| <b>Dyslipidemia</b> | <29              | 11           | 3.07           | 4            | 1.23           | 39           | 8.28           | 8            | 2.19           |

---

|                 |       |     |       |    |       |     |       |     |       |
|-----------------|-------|-----|-------|----|-------|-----|-------|-----|-------|
|                 | 30-39 | 30  | 3.86  | 7  | 1.61  | 98  | 12.01 | 35  | 5.3   |
|                 | 40-49 | 78  | 5.86  | 16 | 2.34  | 117 | 14.72 | 55  | 9.84  |
|                 | 50-59 | 57  | 5.05  | 64 | 9.8   | 196 | 14.03 | 132 | 19.7  |
|                 | 60-69 | 43  | 5.69  | 45 | 11.66 | 148 | 12.2  | 121 | 19.55 |
|                 | 70+   | 60  | 7.31  | 36 | 10    | 109 | 8.69  | 82  | 14.7  |
|                 | <29   | 0   | 0     | 0  | 0     | 3   | 0.64  | 2   | 0.55  |
| <b>Diabetes</b> | 30-39 | 14  | 1.8   | 2  | 0.46  | 23  | 2.82  | 6   | 0.91  |
|                 | 40-49 | 61  | 4.58  | 11 | 1.61  | 60  | 7.55  | 20  | 3.58  |
|                 | 50-59 | 96  | 8.51  | 23 | 3.52  | 186 | 13.31 | 26  | 3.88  |
|                 | 60-69 | 105 | 13.89 | 26 | 6.74  | 235 | 19.37 | 66  | 10.66 |
|                 | 70+   | 103 | 12.55 | 45 | 12.5  | 295 | 23.51 | 82  | 14.7  |

---

Continued tables.

|              |           | Self-reported |                   |              |                |              |                  |              |                   |
|--------------|-----------|---------------|-------------------|--------------|----------------|--------------|------------------|--------------|-------------------|
| Disease      | Age Group | 2008          |                   |              |                | 2017         |                  |              |                   |
|              |           | Man           |                   | Female       |                | Man          |                  | Female       |                   |
|              |           | No. of cases  | Prevalence (%)    | No. of cases | Prevalence (%) | No. of cases | Prevalence (%)   | No. of cases | Prevalence (%)    |
| Hypertension | <29       | 0             | 0                 | 0            | 0              | 0            | 0                | 0            | 0                 |
|              | 30-39     | 33            | 4.25              | 4            | 0.92           | 9            | 1.1 <sub>1</sub> | 4            | 0.61              |
|              | 40-49     | 151           | 11.34             | 42           | 6.13           | 55           | 6.92             | 14           | 2.5 <sub>1</sub>  |
|              | 50-59     | 295           | 26.15             | 115          | 17.61          | 308          | 22.05            | 71           | 10.6 <sub>1</sub> |
|              | 60-69     | 288           | 38.1 <sub>1</sub> | 131          | 33.94          | 388          | 31.99            | 141          | 22.78             |
|              | 70+       | 387           | 47.14             | 186          | 51.67          | 516          | 41.12            | 222          | 39.78             |
| Dyslipidemia | <29       | 3             | 0.84              | 1            | 0.31           | 0            | 0                | 0            | 0                 |

|       |     |       |    |       |     |       |    |       |
|-------|-----|-------|----|-------|-----|-------|----|-------|
| 30-39 | 18  | 2.32  | 1  | 0.23  | 0   | 0     | 0  | 0     |
| 40-49 | 64  | 4.81  | 8  | 1.17  | 1   | 0.13  | 1  | 0.18  |
| 50-59 | 93  | 8.24  | 39 | 5.97  | 46  | 3.29  | 12 | 1.79  |
| 60-69 | 71  | 9.39  | 58 | 15.03 | 39  | 3.22  | 34 | 5.49  |
| 70+   | 82  | 9.99  | 50 | 13.89 | 46  | 3.67  | 41 | 7.35  |
| <29   | 0   | 0     | 0  | 0     | 0   | 0     | 1  | 0.27  |
| 30-39 | 2   | 0.26  | 1  | 0.23  | 2   | 0.25  | 1  | 0.15  |
| 40-49 | 21  | 1.58  | 7  | 1.02  | 8   | 1.01  | 1  | 0.18  |
| 50-59 | 65  | 5.76  | 25 | 3.83  | 72  | 5.15  | 10 | 1.49  |
| 60-69 | 94  | 12.43 | 38 | 9.84  | 123 | 10.14 | 36 | 5.82  |
| 70+   | 135 | 16.44 | 59 | 16.39 | 183 | 14.58 | 57 | 10.22 |

**Diabetes**



**Supplementary Figure 1. Average number of total cardio-metabolic risk factors by age in 2008 and 2017 years.**

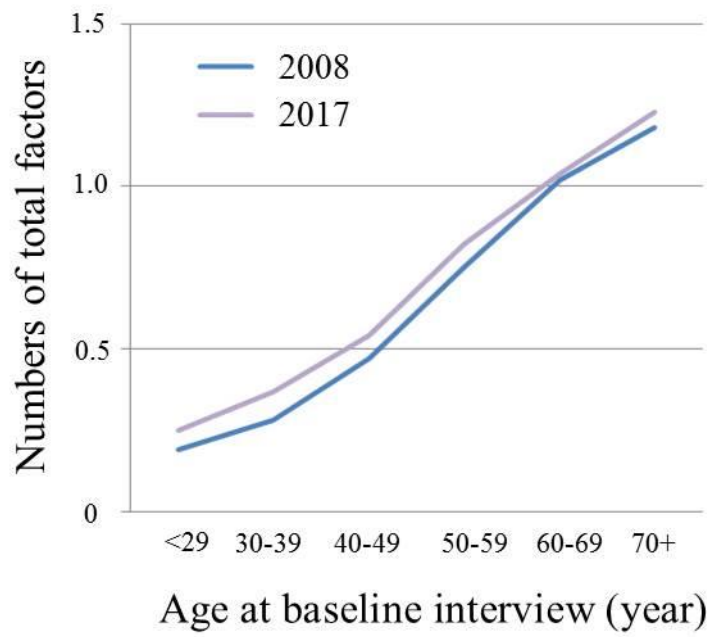

Supplement: inline-supplementary-material-1 [file inline-supplementary-material-1.pdf]
